# Supplementary material for: Mature oligodendrocytes bordering lesions limit demyelination and favor myelin repair via heparan sulfate production
Source: eLife. 2020 Jun 9;9:e51735. doi: 10.7554/eLife.51735 (PMC7308090; doi:10.7554/eLife.51735)
Supplement: Figure 3—source data 1. [file elife-51735-fig3-data1.xlsx]

## Sheet: Feuil1
Figure 3
5dpi WT mice post lesion (Perilesional CC Analysis)
		Among Ndst1
		%Olig2
n=3	Animal 1	94.8356				WT
	Animal 2	100			%	mean	SEM	N
	Animal 3	98.9215			olig2/Ndst1	97.919	1.57283	3
	Moy	97.919
	Ecart type	2.72422
	SEM	1.57283
		Among Ndst1
		%CC1	%PDGFRα
n=4	Animal 1	92.3729	0.847458			WT
	Animal 2	99.1304	0.869565		%	mean	SEM	N
	Animal 3	98.5915	1.40845		CC1	97.5237	1.74129	4
	Animal 4	100	0		PDGFRα	0.781368	0.290963	4
	Moy	97.5237	0.781368
	Ecart type	3.48257	0.581926
	SEM	1.74129	0.290963
		Among Olig2
		%Ndst1
n=3	Animal 1	51.6295				WT
	Animal 2	47.509			%	mean	SEM	N
	Animal 3	40.9415			Ndst1/Olig2	46.6933	3.11219	3
	Moy	46.6933
	Ecart type	5.39047
	SEM	3.11219
		Among CC1	Among PDGFRα
		%Ndst1	%Ndst1
n=4	Animal 1	57.672	11.1111			WT
	Animal 2	29.6104	7.69231		%Ndst1	mean	SEM	N
	Animal 3	68.4887	15		CC1	49.2051	8.63141	4
	Animal 4	41.0494	0		PDGFRα	8.45085	3.18801	4
	Moy	49.2051	8.45085
	Ecart type	17.2628	6.37601
	SEM	8.63141	3.18801
