# Supplementary material for: Mature oligodendrocytes bordering lesions limit demyelination and favor myelin repair via heparan sulfate production
Source: eLife. 2020 Jun 9;9:e51735. doi: 10.7554/eLife.51735 (PMC7308090; doi:10.7554/eLife.51735)
Supplement: Figure 4—figure supplement 1—source data 1. [file elife-51735-fig4-figsupp1-data1.xlsx]

## Sheet: Feuil1
Figure 4 Supplement1
WT and Mutant Mice without Lesion (CC analysis)
	Myelin Content				Myelin Content in % of ctl
		WT n=3	Mutant n=3			WT n=3	Mutant n=3				WT			Mutant
	Animal 1	2.66667	2.33333		Animal 1	100	87.5				mean	SEM	N	mean	SEM	N
	Animal 2	2.88889	3		Animal 2	100	103.846			Myelin Content (%)	100	0	3	82.0616	14.4062	3
	Animal 3	3.44444	1.88889		Animal 3	100	54.8387
	Moy	3	2.40741		Moy	100	82.0616
	Ecart type	0.400617	0.559247		Ecart type	0	24.9522
	SEM	0.231296	0.322881		SEM	0	14.4062
	Astrocyte density
		WT n=2	Mutant n=3								WT			Mutant
	Animal 1	276.224	207.692								mean	SEM	N	mean	SEM	N
	Animal 2	319.527	263.566							Astrocyte density	292.308	21.6514	2	267.622	32.3481	3
	Animal 3		319.749
	Moy	292.308	267.622
	Ecart type	30.6197	56.0285
	SEM	21.6514	32.3481
		Oligodendroglial lineage cell density (cellnumber/mm²)
		WT n=2			Mutant n=5						WT			Mutant
		Olig2	CC1	PDGFRα	Olig2	CC1	PDGFRα			Density	mean	SEM	N	mean	SEM	N
	Animal 1	2832.5	2685	110	2250.27	1685.56	84.492			Olig2	2740.01	92.4851	2	2976.86	296.054	5
	Animal 2	2647.53	2536.6	67.4748	2739.62	2664.54	67.0927			CC1	2610.8	74.2017	2	2816.34	373.172	5
	Animal 3				2549.94	2461.44	75.8534			PDGFRα	88.7374	21.2626	2	60.0978	10.1872	5
	Animal 4				3770.62	3726.8	42.5258
	Animal 5				3573.87	3543.35	30.525
	Moy	2740.01	2610.8	88.7374	2976.86	2816.34	60.0978
	Ecart type	130.794	104.937	30.0698	661.997	834.437	22.7792
	SEM	92.4851	74.2017	21.2626	296.054	373.172	10.1872
		Oligodendroglial lineage cell density (%among olig2)
		WT n=2		Mutant n=5							WT			Mutant
		CC1	PDGFRα	CC1	PDGFRα					%	mean	SEM	N	mean	SEM	N
	Animal 1	94.7926	3.8835	74.9049	3.75475					CC1	95.3013	0.508675	2	93.3356	4.63316	5
	Animal 2	95.8099	2.5486	97.2595	2.44898					PDGFRα	3.21605	0.66745	2	2.23208	0.54933	5
	Animal 3			96.5295	2.97471
	Animal 4			98.838	1.12782
	Animal 5			99.1459	0.854117
	Moy	95.3013	3.21605	93.3356	2.23208
	Ecart type	0.719374	0.943916	10.3601	1.22834
	SEM	0.508675	0.66745	4.63316	0.54933
		Oligodendroglial lineage cell density (%among olig2)
		WT n=2		Mutant n=3							WT			Mutant
		CC1	PDGFRα	CC1	PDGFRα					%	mean	SEM	N	mean	SEM	N
	Animal 1	94.7926	3.8835	74.9049	3.75475					CC1	95.3013	0.508675	2	89.5646	7.33288	3
	Animal 2	95.8099	2.5486	97.2595	2.44898					PDGFRα	3.21605	0.66745	2	3.05948	0.37932	3
	Animal 3			96.5295	2.97471
	Moy	95.3013	3.21605	89.5646	3.05948
	Ecart type	0.719374	0.943916	12.7009	0.657001
	SEM	0.508675	0.66745	7.33288	0.37932
