# Supplementary material for: Mature oligodendrocytes bordering lesions limit demyelination and favor myelin repair via heparan sulfate production
Source: eLife. 2020 Jun 9;9:e51735. doi: 10.7554/eLife.51735 (PMC7308090; doi:10.7554/eLife.51735)
Supplement: Figure 4—source data 1. [file elife-51735-fig4-data1.xlsx]

## Sheet: SumUp Data
Figure 4	HS Immunopositive Area	% of CT			CT	Mutant
CT11	5.07664	100		moy	100	43.033
Flx635	2.61203	51.452		sd	9.06126	7.8084
CT827	2.79348	110.084		sem	4.53063	3.9042
CT881	2.23587	88.1102
CT883	2.58341	101.806
Moy	2.53759	100
Flx820	1.19244	46.9913
Flx822	0.85518	33.7005
Flx830	1.01473	39.9881
