# Supplementary material for: Mature oligodendrocytes bordering lesions limit demyelination and favor myelin repair via heparan sulfate production
Source: eLife. 2020 Jun 9;9:e51735. doi: 10.7554/eLife.51735 (PMC7308090; doi:10.7554/eLife.51735)
Supplement: Figure 5—source data 1. [file elife-51735-fig5-data1.xlsx]

## Sheet: Fig5
Figure 5																				Lezion size WT vs Mut 8dpi
	WT and Mutant Mice post Lesion - Time Course - (peri lesional CC analysis)
Lezion size
4dpi	WT n=8	Mutant n=9		8dpi	WT n=9	Mutant n=12		14dpi	WT n=4	Mutant n=6			WT			Mutant
Animal 1	0.1342	0.2784		Animal 1	0.1196	0.2926		Animal 1	0.0918	0.084		Lesion size	mean	SEM	N	mean	SEM	N
Animal 2	0.1002	0.0984		Animal 2	0.0436	0.0788		Animal 2	0.0262	0		4dpi	0.225839	0.0365258	8	0.158933	0.0332294	9
Animal 3	0.162	0.1864		Animal 3	0.0666	0.3912		Animal 3	0.0144	0.0288		8dpi	0.0970812	0.0216669	9	0.198577	0.0317557	12
Animal 4	0.1622	0.0466		Animal 4	0.2496	0.1502		Animal 4	0	0.0158		14dpi	0.0331	0.0202867	4	0.0284333	0.0120116	6
Animal 5	0.214598	0.12		Animal 5	0.0544	0.2042		Animal 5		0.012
Animal 6	0.341001	0.0812818		Animal 6	0.117477	0.264		Animal 6		0.03
Animal 7	0.348919	0.16673		Animal 7	0.0527352	0.249975
Animal 8	0.343593	0.351813		Animal 8	0.05537	0.0973872
Animal 9		0.100769		Animal 9	0.114349	0.35401
				Animal 10		0.105365
				Animal 11		0.102289
				Animal 12		0.0928922
Moy	0.225839	0.158933		Moy	0.0970812	0.198577		Moy	0.0331	0.0284333
Ecart type	0.10331	0.0996881		Ecart type	0.0650006	0.110005		Ecart type	0.0405734	0.0294223
SEM	0.0365258	0.0332294		SEM	0.0216669	0.0317557		SEM	0.0202867	0.0120116
WT and Mutant Mice post Lesion - Time Course - (peri lesional CC analysis)
	Olig2 density
	CTL		4dpi		8dpi		14dpi
	WT n=2	Mutant n=5	WT n=9	Mutant n=8	WT n=12	Mutant n=16	WT n=4	Mutant n=4		Density	WT			Mutant
Animal 1	2832.5	2250.27	1451.49	1339.33	3048.49	2123.72	3398.65	3224.49		Olig2	mean	SEM	N	mean	SEM	N
Animal 2	2647.53	2739.62	1320.81	1935.64	3306.31	2421.32	2804.69	3989.1		CTL	2740.01	92.4851	2	2976.86	296.054	5
Animal 3		2549.94	837.662	1120.13	2497.6	1467.28	4187.21	3263.16		4dpi	1217.45	91.3025	9	1270.9	115.63	8
Animal 4		3770.62	1735.96	1501.98	2588.24	1753.66	4071.43	3924.88		8dpi	2033.6	207.594	12	1765.72	104.823	16
Animal 5		3573.87	1226.77	1071.66	1435.8	1729.73				14dpi	3615.49	321.347	4	3600.41	206.442	4
Animal 6			880.442	971.045	1343.61	1543.64
Animal 7			1179.63	960.384	1732.97	2251.4
Animal 8			1147.17	1267.01	1078.58	1403.85
Animal 9			1177.13		2293.57	1511.4
Animal 10					2111.47	1494.39
Animal 11					1465.77	1544.32
Animal 12					1500.77	2118.25
Animal 13						2603.12
Animal 14						1504.5
Animal 15						1066.62
Animal 16						1714.36
Moy	2740.01	2976.86	1217.45	1270.9	2033.6	1765.72	3615.49	3600.41
Ecart type	130.794	661.997	273.907	327.052	719.127	419.292	642.695	412.883
SEM	92.4851	296.054	91.3025	115.63	207.594	104.823	321.347	206.442
														Decrease of Olig2 Ctl vs 4dpi for WT mice													Decrease of Olig2 Ctl vs 4dpi for Mutant mice
	Decrease of Olig2
	4dpi			%
	WT n=9	Mutant n=8		WT n=9	Mutant n=8
Animal 1	52.974	44.9914		47.026	55.0086
Animal 2	48.2045	65.023		51.7955	34.977			WT			Mutant
Animal 3	30.5715	37.6279		69.4285	62.3721		%	mean	SEM	N	mean	SEM	N
Animal 4	63.3558	50.4551		36.6442	49.5449		Olig2 Decrease	55.5677	3.3322	9	57.3074	3.8843	8
Animal 5	44.7723	35.9997		55.2277	64.0003
Animal 6	32.1328	32.6198		67.8672	67.3802
Animal 7	43.0519	32.2616		56.9481	67.7384
Animal 8	41.8672	42.562		58.1328	57.438
Animal 9	42.9609			57.0391
Moy	44.4323	42.6926		55.5677	57.3074
Ecart type	9.99659	10.9865		9.99659	10.9865
SEM	3.3322	3.8843		3.3322	3.8843
	CC1 density
	CTL		4dpi		8dpi		14dpi			Density	WT			Mutant
	WT n=2	Mutant n=5	WT n=5	Mutant n=4	WT n=3	Mutant n=5	WT n=4	Mutant n=4		CC1	mean	SEM	N	mean	SEM	N
Animal 1	2685	1685.56	305.97	488.432	1273.27	509.228	1709.46	2309.52		CTL	2610.8	74.2017	2	2816.34	373.172	5
Animal 2	2536.6	2664.54	138.728	737.624	836.538	1411.17	1252.6	2730.25		4dpi	290.093	63.9814	5	433.525	120.195	4
Animal 3		2461.44	266.234	172.078	1632.35	562.883	3497.72	2336.84		8dpi	1247.39	230.096	3	965.163	213.917	5
Animal 4		3726.8	449.438	335.968		809.587	2040.82	2863.85		14dpi	2125.15	485.214	4	2560.12	139.596	4
Animal 5		3543.35				1532.95
Moy	2610.8	2816.34	290.093	433.525	1247.39	965.163	2125.15	2560.12
Ecart type	104.937	834.437	127.963	240.39	398.538	478.334	970.427	279.193
SEM	74.2017	373.172	63.9814	120.195	230.096	213.917	485.214	139.596
																Proliferating cells WT vs Mut 8dpi
Proliferating cells
4dpi	WT n=9	Mutant n=8		8dpi	WT n=12	Mutant n=16				WT			Mutant
Animal 1	185.237	150.835		Animal 1	79.6354	141.614		Proliferating cells		mean	SEM	N	mean	SEM	N
Animal 2	98.8565	197.495		Animal 2	109.62	172.106			4dpi	100	13.6386	9	114.343	16.2611	8
Animal 3	54.1115	63.0087		Animal 3	39.1766	732.4			8dpi	100	13.4873	12	217.805	42.7742	16
Animal 4	45.4753	59.7292		Animal 4	171.568	301.976
Animal 5	116.319	131.291		Animal 5	147.092	228.325
Animal 6	100.545	109.839		Animal 6	129.343	304.172
Animal 7	85.0267	89.1345		Animal 7	60.0416	23.9228
Animal 8	92.1735	113.413		Animal 8	63.5236	266.004
Animal 9	122.255			Animal 9	31.8623	103.334
				Animal 10	113.988	93.7161
				Animal 11	161.518	86.9811
				Animal 12	92.6319	77.2508
				Animal 13		61.8801
				Animal 14		303.492
				Animal 15		253.549
				Animal 16		334.154
Moy	100	114.343		Moy	100	217.805
Ecart type	40.9157	45.9934		Ecart type	46.7214	171.097
SEM	13.6386	16.2611		SEM	13.4873	42.7742
																Proliferating OPCs WT vs Mut 8dpi
Proliferating OPCs
4dpi	WT n=6	Mutant n=7		8dpi	WT n=11	Mutant n=13				WT			Mutant
Animal 1	21.7822	9.13462		Animal 1	2.76753	9.13884		Proliferating OPCs		mean	SEM	N	mean	SEM	N
Animal 2	8.24561	9.78044		Animal 2	1.21951	6.94006			4dpi	22.9984	3.58634	6	17.0359	2.64289	7
Animal 3	34.5756	10.3306		Animal 3	0.854701	12.9204			8dpi	3.16538	0.549246	11	7.55985	0.789744	13
Animal 4	28.0277	23.7864		Animal 4	4.10367	2.19595
Animal 5	24.5774	22.6075		Animal 5	3.05344	9.67742
Animal 6	20.7819	19.4377		Animal 6	0.611621	6.97674
Animal 7		24.1739		Animal 7	5.36278	5.05415
				Animal 8	4.09091	4.09836
				Animal 9	3.7037	6.09418
				Animal 10	6.37088	6.94087
				Animal 11	2.68041	8.72093
				Animal 12		10.1253
				Animal 13		9.3949
Moy	22.9984	17.0359		Moy	3.16538	7.55985
Ecart type	8.7847	6.99244		Ecart type	1.82164	2.84746
SEM	3.58634	2.64289		SEM	0.549246	0.789744
