# Supplementary material for: Mature oligodendrocytes bordering lesions limit demyelination and favor myelin repair via heparan sulfate production
Source: eLife. 2020 Jun 9;9:e51735. doi: 10.7554/eLife.51735 (PMC7308090; doi:10.7554/eLife.51735)
Supplement: Figure 6—source data 1. [file elife-51735-fig6-data1.xlsx]

## Sheet: Fig5
Figure 6																WT vs Mut 8dpi
Proliferating microglia/macrophages
4dpi	WT n=3	Mutant n=3		8dpi	WT n=7	Mutant n=7				WT			Mutant
Animal 1	167.742	56.0976		Animal 1	16.129	149.091		Proliferating M/M		mean	SEM	N	mean	SEM	N
Animal 2	13.8889	55.5556		Animal 2	71.4286	230.53			4dpi	70.0403	49.0323	3	69.3462	13.5206	3
Animal 3	28.49	96.3855		Animal 3	43.4783	90.4762			8dpi	79.3064	20.5996	7	166.422	24.3315	7
				Animal 4	173.496	252.958
				Animal 5	94.2436	210.501
				Animal 6	37.027	123.116
				Animal 7	119.343	108.284
Moy	70.0403	69.3462		Moy	79.3064	166.422
Ecart type	84.9265	23.4183		Ecart type	54.5013	64.375
SEM	49.0323	13.5206		SEM	20.5996	24.3315
																WT vs Mut 8dpi
Ratio Rhom/Ram
4dpi	WT n=3	Mutant n=3		8dpi	WT n=4	Mutant n=6				WT			Mutant
Animal 1	0.713415	0.470922		Animal 1	0.351351	0.921348		Ratio Rhom/Ram		mean	SEM	N	mean	SEM	N
Animal 2	0.183521	0.299065		Animal 2	0.19242	0.359712			4dpi	0.538625	0.17756	3	0.436038	0.071181	3
Animal 3	0.718941	0.538126		Animal 3	0.387352	0.375796			8dpi	0.281095	0.0514822	4	0.669309	0.156823	6
				Animal 4	0.193258	1.33333
				Animal 5		0.547325
				Animal 6		0.478336
Moy	0.538625	0.436038		Moy	0.281095	0.669309
Ecart type	0.307542	0.123289		Ecart type	0.102964	0.384136
SEM	0.17756	0.071181		SEM	0.0514822	0.156823
													WT vs Mut 8dpi
Cox2 Density
8dpi	WT n=4	Mutant n=5					WT			Mutant
Animal 1	1745.18	2301.87			Cox2 Density		mean	SEM	N	mean	SEM	N
Animal 2	2104.65	2923.55				8dpi	1610.28	195.947	4	2844.5	283.817	5
Animal 3	1304.22	2523.65
Animal 4	1287.06	2565.97
Animal 5		3907.44
Moy	1610.28	2844.5
Ecart type	391.893	634.635
SEM	195.947	283.817
