# Supplementary material for: Mature oligodendrocytes bordering lesions limit demyelination and favor myelin repair via heparan sulfate production
Source: eLife. 2020 Jun 9;9:e51735. doi: 10.7554/eLife.51735 (PMC7308090; doi:10.7554/eLife.51735)
Supplement: Figure 7—source data 1. [file elife-51735-fig7-data1.xlsx]

## Sheet: Fig6
Figure 7
	Mean Ptch1 dot/nucleus							WT			Mutant
	8dpi	WT n=4	Mutant n=5			Mean Ptch1 dot per nucleus		mean	SEM	N	mean	SEM	N
	Animal 1	13.927	7.50057				8dpi	13.7932	3.01958	4	8.55577	0.675247	5
	Animal 2	10.4637	6.67518
	Animal 3	22.2176	8.94267
	Animal 4	8.56441	10.562
	Animal 5		9.09846
	Moy	13.7932	8.55577
	Ecart type	6.03915	1.5099
	SEM	3.01958	0.675247
