# Supplementary material for: Mature oligodendrocytes bordering lesions limit demyelination and favor myelin repair via heparan sulfate production
Source: eLife. 2020 Jun 9;9:e51735. doi: 10.7554/eLife.51735 (PMC7308090; doi:10.7554/eLife.51735)
Supplement: Figure 8—source data 1. [file elife-51735-fig8-data1.xlsx]

## Sheet: C_raw data
	Lesions	NAWM	Controls
MS122	384469	132777			C normality test
MS176	113490	37780.8				Lesions	NAWM	Controls
MS136	259114	143863			Number of values	9	9	4
MS154	107321	89981.5
MS207	399086	108909			Minimum	54867	23247	1783
MS230	54867	62343.3			Maximum	657102	160530	4698
MS187	215445	71085.3
MS121	657102	160530
MS100	233268	23247			D'Agostino & Pearson omnibus normality test
CO14			3173.94		K2	3.152	1.04	N too small
CO25			1782.71		P value	0.2068	0.5944
CO28			4697.74		Passed normality test (alpha=0.05)?	Yes	Yes
CO39			3727.62		P value summary	ns	ns
					Sum	2424000	830516	13382
Mean	269351	92279.6	3345.5
SD	187515	47856.2	1217.42

## Sheet: C_normality test
	Lesions	NAWM	Controls
Number of values	9	9	4
Minimum	54867	23247	1783
Maximum	657102	160530	4698
D'Agostino & Pearson omnibus normality test
K2	3.152	1.04	N too small
P value	0.2068	0.5944
Passed normality test (alpha=0.05)?	Yes	Yes
P value summary	ns	ns
Sum	2424000	830516	13382

## Sheet: C_Stats
KRUSKAL-WALLIS
Parameter
Table Analyzed	*MS NAWM vs MS lesions normalised per area
Kruskal-Wallis test
P value	0.0014
Exact or approximate P value?	Gaussian Approximation
P value summary	**
Do the medians vary signif. (P < 0.05)	Yes
Number of groups	3
Kruskal-Wallis statistic	13.09
Dunn's Multiple Comparison Test	Difference in rank sum	Significant? P < 0.05?	Summary			P value Typo in manuscript!
Lesions vs NAWM	5.889	No	ns
Lesions vs Controls	13.94	Yes	**
NAWM vs Controls	8.056	No	ns
PAIRED T-TEST
Parameter
Table Analyzed	*MS NAWM vs MS lesions normalised per area
Column A	Lesions
vs	vs
Column B	NAWM
Paired t test
P value	0.0095
P value summary	**
Are means signif. different? (P < 0.05)	Yes
One- or two-tailed P value?	Two-tailed
t, df	t=3.392 df=8
Number of pairs	9
How big is the difference?
Mean of differences	177072
95% confidence interval	56675 to 297469
R square	0.5898
How effective was the pairing?
Correlation coefficient (r)	0.7198
P Value (one tailed)	0.0144
P value summary	*
Was the pairing significantly effective?	Yes

## Sheet: H_Raw data
	OLIG2+ proportion	GFAP+ proportion	NEUN+ proportion	IBA1+ cells
NAWM	68.3188	21.0667	2.87715	7.73737
RM	56.7125	27.3649	4.62564	11.2969
A	61.8175	22.1805	1.53638	14.4656
CA	62.015	25.555	0.777747	11.6523
CI	45.5119	36.3692	3.42713	14.6918

## Sheet: I_raw data
	A	RM	CA	CI	NAWM	Control
MS154,A2E2				90.4897
MS154,A2E2	82.5218
MS154,A2E2		93.5456
MS154,A2E2					28.1084
MS230	92.3095
MS230	78.3384
MS230		74.3983
MS230		79.6686
MS230					78.686
MS230					73.1575
MS176,P4D1				58.31
MS176,P4D1		70.97
MS176,P4D1		35.45
MS176,P4D1				47.25
MS176,P4D1		47.47
MS176,P4D1		65.42
MS176,P4D1		72.52
MS176,P4D1					33.39
MS100,P2E2		85.272
MS100,P2E2		61.884
MS100,P2E2				64.7394
MS100,P2E2				83.1634
MS100,P2E2				40.9552
MS100,P2E2				27.1054
MS100,P2E2					47.9345
MS136,P1D3				52.3809
MS136,P1D3		65.2174
MS136,P1D3		53.5211
MS136,P1D3				30.7692
MS136,P1D3					34.6053
MS207,P2C4			70.5882
MS207,P2C4		68.1818
MS207,P2C4			70
MS207,P2C4					55.1601
MS121	46.4286
MS121			55.8139
MS121					70.4545
MS146,P3B4	81.8182
MS146,P3B4		73.8095
MS146,P3B4		66.6667
MS146,P3B4		55
MS146,P3B4					56.3037
MS146,P3B4				80
MS207,A2D3					83.869
MS207,A2D3		72.7366
MS207,A2D3				61.5385
MS207,A2D3				58.3333
MS187,P3D1					79.2834
MS187,P3D1		84.6055
MS187,P3D1		82.6436
MS187,P3D1		85.3394
MS187,P3D1		85.4985
MS154,A2D7					82.4895
MS154,A2D7	93.2539
MS122				21.7665
MS122					85.6519
MS122	78.77
MS207,A2B3				68
MS207,A2B3			80.9524
MS207,A2B3					65.3846
CO39						47.8503
CO25						42.2146
CO14						35.6432
CO28						46.8013

## Sheet: I_normality test
	A	RM	CA	CI	NAWM	Control
Number of values	7	21	4	14	14	4
Minimum	46.43	35.45	55.81	21.77	28.11	35.64
25% Percentile	78.34	63.55	59.36	38.41	44.6	37.29
Median	81.82	72.52	70.29	58.32	67.92	44.51
75% Percentile	92.31	83.62	78.36	71	80.08	47.59
Maximum	93.25	93.55	80.95	90.49	85.65	47.85
Mean	79.06	70.47	69.34	56.06	62.46	43.13
Std. Deviation	15.61	14.31	10.32	20.98	20.06	5.557
Std. Error	5.9	3.123	5.162	5.608	5.363	2.779
Lower 95% CI of mean	64.63	63.95	52.91	43.94	50.88	34.28
Upper 95% CI of mean	93.5	76.98	85.77	68.17	74.05	51.97
D'Agostino & Pearson omnibus normality test
K2	N too small	2.429	N too small	0.4392	2.304	N too small
P value		0.2969		0.8028	0.316
Passed normality test (alpha=0.05)?		Yes		Yes	Yes
P value summary		ns		ns	ns
Sum	553.4	1480	277.4	784.8	874.5	172.5

## Sheet: I_stats
Parameter
Table Analyzed	%olig2 cells which are NDST1+
Kruskal-Wallis test
P value	0.0162
Exact or approximate P value?	Gaussian Approximation
P value summary	*
Do the medians vary signif. (P < 0.05)	Yes
Number of groups	6
Kruskal-Wallis statistic	13.92
Dunn's Multiple Comparison Test	Difference in rank sum	Significant? P < 0.05?	Summary
A vs RM	8.619	No	ns
A vs CA	11.57	No	ns
A vs CI	22.29	No	ns
A vs NAWM	15.71	No	ns
A vs Control	35.32	Yes	*
RM vs CA	2.952	No	ns
RM vs CI	13.67	No	ns
RM vs NAWM	7.095	No	ns
RM vs Control	26.7	No	ns
CA vs CI	10.71	No	ns
CA vs NAWM	4.143	No	ns
CA vs Control	23.75	No	ns
CI vs NAWM	-6.571	No	ns
CI vs Control	13.04	No	ns
NAWM vs Control	19.61	No	ns

## Sheet: J_raw data
Area µm²	Olig2+ NDST1+ cells*1000000
899311	108.501
1.54522e+06	64.5078
2.27375e+06	55.3449
935118	77.025
2.74476e+06	40.0162
6.06105e+06	33.723
5.81784e+06	40.0162
3.46118e+06	55.3449
4.77438e+06	108.501
410287	77.025
863165	33.723
1.52288e+07	46.9706
4.05083e+06	98.2997
1.36951e+07	4.80028
3.43713e+07	20.6038
2.65168e+06	121.482
3.90496e+06	114.49
411164	75.9566
336407	106.921
2.00408e+06	82.6432
1.179e+06	177.602
1.42896e+06	101.865
844989	123.982
430561	399.396
8.74141e+06	320.039
1.70904e+06	330.07
373057	114.371
5.11444e+06	13.9468
1.94125e+06	66.8856
4.29094e+06	115.527
8.19759e+06	18.8466
417236	128.93
5.94528e+06	48.7668
1.10355e+06	27.2946
1.02037e+07	26.7809
577876	48.6633
6.00077e+07	45.8296
5.36126e+06	23.4412
1.53167e+06	5.2281
1.4243e+07	4.70956
1.54787e+07	0.883071
8.184e+06	57.0638
5.2862e+06	17.3323
7.19755e+06	67.1135
2.96034e+06	58.1718
5.11707e+06	136.478
335811	271.02
8.41323e+06	214.756

## Sheet: J_stats
Number of XY Pairs	48
Spearman r	-0.4761
95% confidence interval	-0.6744 to -0.2137
P value (two-tailed)	0.0006
P value summary	***
Exact or approximate P value?	Gaussian Approximation
Is the correlation significant? (alpha=0.05)	Yes

## Sheet: K_raw data
	Remyelination score	Average NDST1+ cells/patient
MS122	1	145.749
MS207	1.125	149.641
MS100	1	174.543
MS136	2.2	206.932
MS121	1.5	265.561
MS176	2.14286	267.476
MS230	2.5	366.683
MS154	1.75	416.599
MS187	3	616.842

[truncated: 1 more sheets: K_linear regression]
